# Supplementary material
Source: publisher site journal article supplement (https://www.dovepress.com/article/565885)
Supplement: Supplementary file 1 [file Manuascript%20565885_Supplementary%20Materials.docx]

**Supplementary Table S1. Full covariate model predicting pain neurophysiology knowledge (RNPQ).**

*Unstandardized regression coefficients (B), robust standard errors (HC3), p-values, and 95% confidence intervals are presented. The model includes agreement with knowledge sources, demographic variables, and institutional variables*.

| **Predictor** | **B** | **Robust SE** | **p** | **95% CI** |
| --- | --- | --- | --- | --- |
| **Intercept** | 6.616 | 0.678 | < 0.001 | 5.288, 7.944 |
| **HC-PAIRS** | -0.03 | 0.004 | < 0.001 | -0.037, -0.023 |
| **Age** | -0.024 | 0.022 | 0.271 | -0.068, 0.019 |
| **Gender Male vs (Female)** | -0.001 | 0.058 | 0.983 | -0.112, 0.114 |
| **Discipline PT (vs OT)** | -0.428 | 0.365 | 0.241 | -1.143, 0.287 |
| **University JU (vs HU)** | -0.013 | 0.076 | 0.869 | -0.162, 0.136 |
| **University JUST (vs HU)** | 0.057 | 0.072 | 0.432 | -0.085, 0.199 |
| **University Courses** | 0.693 | 0.134 | < 0.001 | 0.43, 0.955 |
| **Clinical Training** | 0.044 | 0.035 | 0.204 | -0.024, 0.112 |
| **Internet** | 0.026 | 0.027 | 0.449 | -0.032, 0.073 |
| **Self-study** | 0.02 | 0.031 | 0.517 | -0.041, 0.082 |
| **Other** | -0.001 | 0.031 | 0.973 | -0.06, 0.058 |
| **PT x University Courses** | 0.300 | 0.146 | 0.040 | 0.013, 0.587 |

RNPQ: Revised Neurophysiology of Pain Questionnaire; SE: Standard error; PT: Physiotherapy; OT: Occupational Therapy; HU: The Hashemite University; JU: The University of Jordan; JUST: Jordan University of Science and Technology. Reference groups: Female (gender), OT (discipline), HU (university). Robust SE computed using HC3 estimation.

**Supplementary Table S2. Model fit comparison, including the sensitivity model.***Model fit indices are reported for the reduced model, the interaction model, and the full covariate model.*

| **Fit Statistic** | **Reduced Model** | **Interaction Model** | **Full Covariate Model** |
| --- | --- | --- | --- |
| **R²** | 0.857 | 0.868 | 0.871 |
| **Adjusted R²** | 0.855 | 0.865 | 0.864 |
| **F-statistic** | 363.73 | 352.35 | 128.05 |
| **F p-value** | < 0.001 | < 0.001 | < 0.001 |
| **AIC** | 232.31 | 217.670 | 227.320 |
| **BIC** | 245.82 | 234.540 | 271.190 |

AIC: Akaike Information Criterion; BIC: Bayesian Information Criterion.

**Supplementary Table S3. Variance inflation factor (VIF) values for all variables included in the regression model.***VIF values quantify the degree of multicollinearity among predictors.*

| **Variable** | **VIF** |
| --- | --- |
| **HC-PAIRS** | 1.40 |
| **Age** | 1.03 |
| **Gender Male vs (Female)** | 1.018694908 |
| **Discipline PT (vs OT)** | 15.0860886 |
| **University JU (vs HU)** | 1.436446911 |
| **University JUST (vs HU)** | 1.487056716 |
| **University Courses** | 5.409250788 |
| **Clinical Training** | 1.01843625 |
| **Internet** | 1.041219815 |
| **Self-study** | 1.036216308 |
| **Other** | 1.065521974 |
| **PT x University Courses** | 24.4839869 |

PT: Physiotherapy; OT: Occupational Therapy; HU: The Hashemite University; JU: The University of Jordan; JUST: Jordan University of Science and Technology.


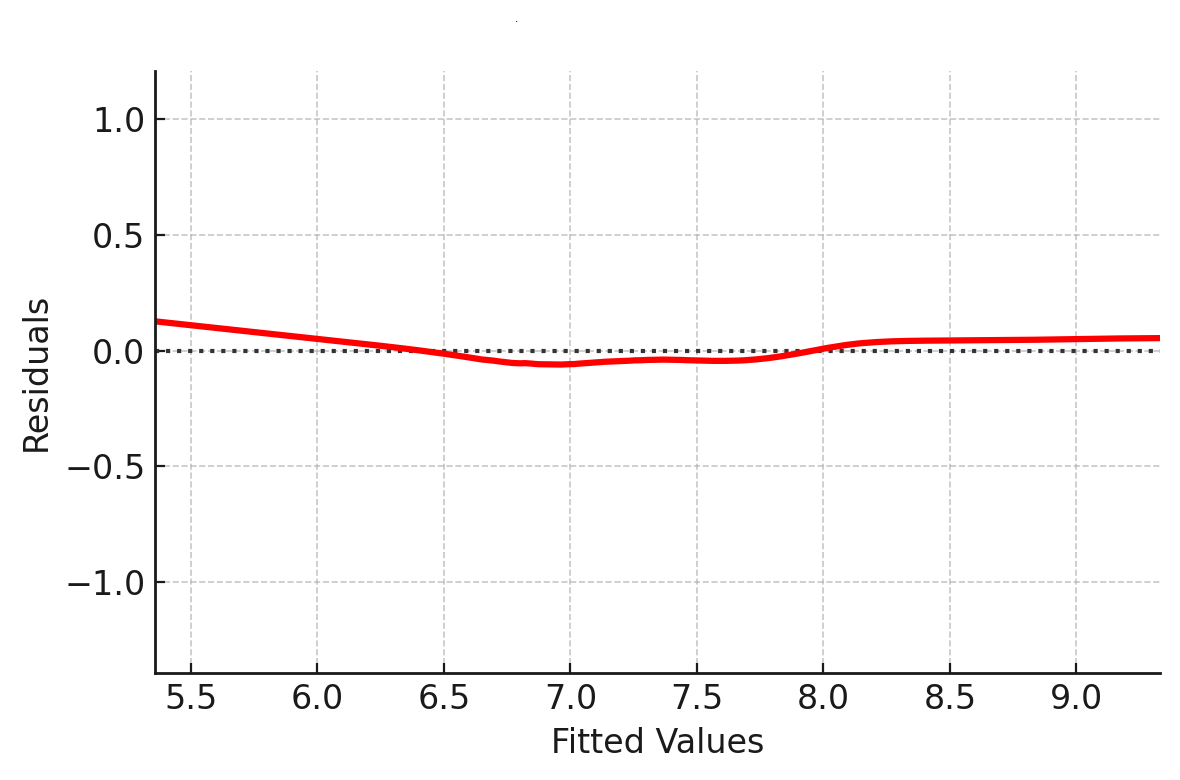


**Supplementary Figure S1.** Residuals versus fitted values plot for the interaction model predicting Revised Neurophysiology of Pain Questionnaire (RNPQ) scores. The plot is used to assess linearity and homoscedasticity assumptions.


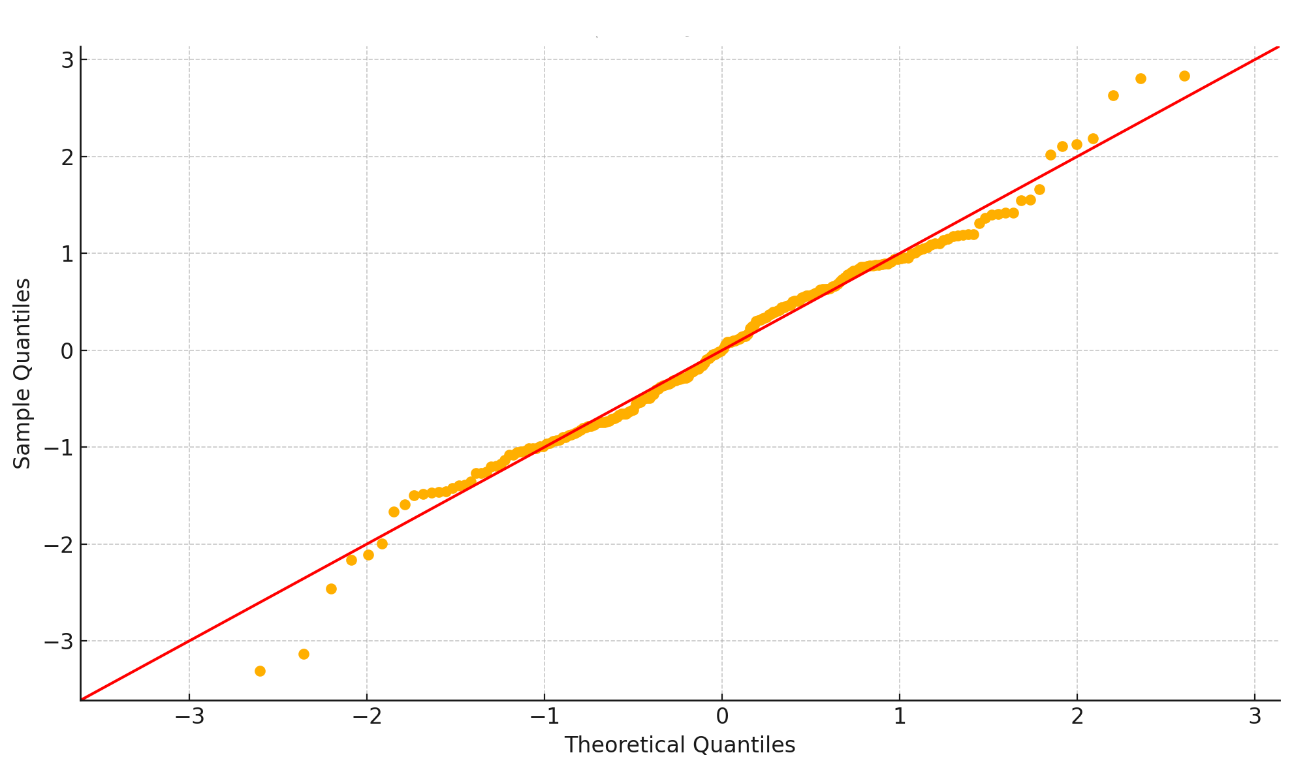


**Supplementary Figure S2.** Quantile–quantile (Q–Q) plot of standardized residuals for the interaction model predicting Revised Neurophysiology of Pain Questionnaire (RNPQ) scores. The plot is used to assess normality of residuals.
